# Supplementary material for: Association between Red Cell Distribution Width and Outcomes of Nonagenarians Admitted to the Intensive Care Unit—A Retrospective Cohort Study
Source: MDPI journal article supplement (doi:10.3390/diagnostics13203279), 2023-10-23
Supplement: s1 [file s1]

**Supplementary Figure S1:** 1-Year Kaplan-Meier survival estimates stratified according Red Cell Distribution Width ( $\leq 14.5\%$  vs.  $> 14.5\%$ ) (Log-Rank:  $p < 0.001$ )

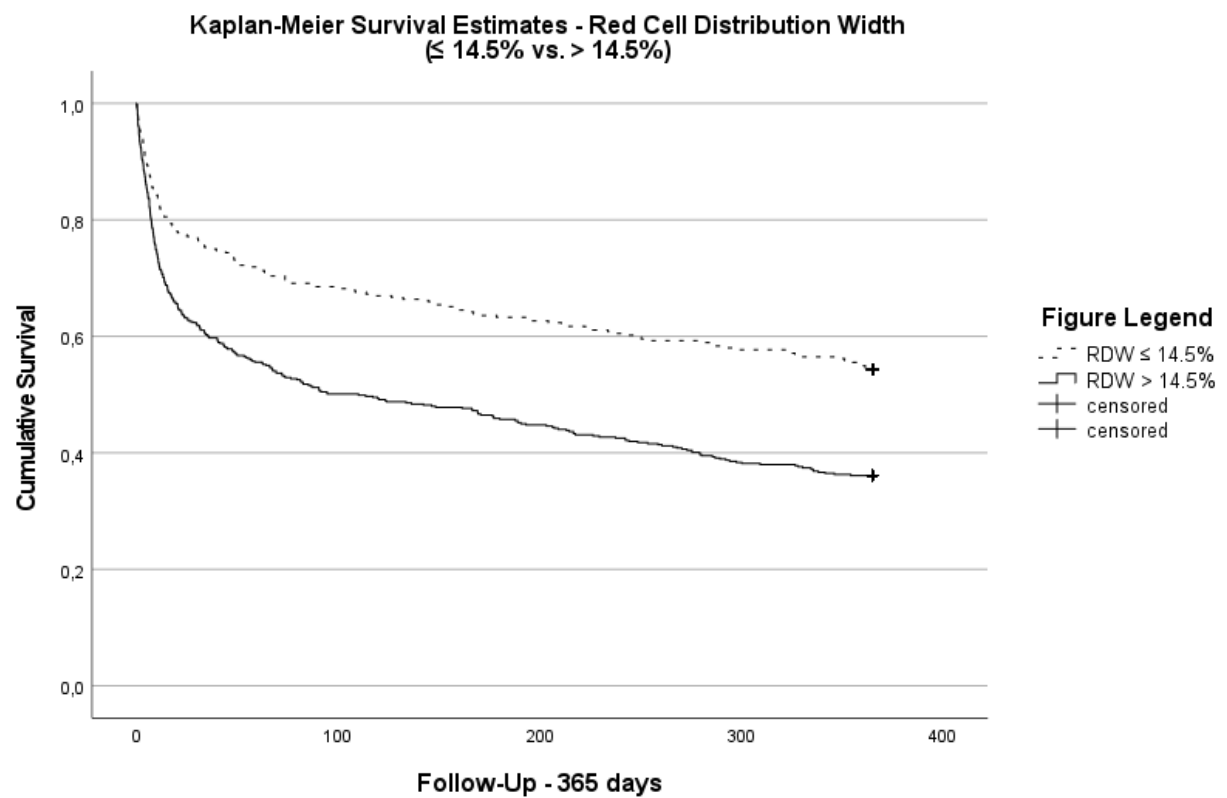

**Supplementary Table S1** – Pre-existing comorbidities

| <i>Parameters</i>                        | <i><b>RDW ≤ 14.5%</b></i><br><i>(n = 327)</i> | <i><b>RDW &gt; 14.5%</b></i><br><i>(n = 536)</i> | <i>p-value</i> |
|------------------------------------------|-----------------------------------------------|--------------------------------------------------|----------------|
| <b>AIDS n (%)</b>                        | 0 (0)                                         | 1 (0)                                            | 0.434          |
| <b>Cerebral arterial disease n (%)</b>   | 49 (15)                                       | 90 (17)                                          | 0.484          |
| <b>Chronic lung disease n (%)</b>        | 23 (7)                                        | 46 (9)                                           | 0.416          |
| <b>Chronic kidney disease n (%)</b>      | 56 (17)                                       | 143 (27)                                         | 0.001          |
| <b>Congestive heart disease n (%)</b>    | 50 (15)                                       | 126 (24)                                         | 0.004          |
| <b>Connective tissue disease n (%)</b>   | 2 (1)                                         | 0 (0)                                            | 0.070          |
| <b>Coronary heart disease n (%)</b>      | 56 (17)                                       | 71 (13)                                          | 0.119          |
| <b>Dementia n (%)</b>                    | 57 (17)                                       | 110 (21)                                         | 0.265          |
| <b>Diabetes Mellitus n (%)</b>           | 46 (14)                                       | 69 (13)                                          | 0.617          |
| <b>Liver cirrhosis n (%)</b>             | 3 (1)                                         | 4 (1)                                            | 0.786          |
| <b>Peripheral arterial disease n (%)</b> | 27 (9)                                        | 51 (10)                                          | 0.532          |
| <b>Malignancy n (%)</b>                  |                                               |                                                  |                |
| Solid tumor                              | 28 (9)                                        | 53 (10)                                          | 0.517          |
| Leukemia                                 | 1 (0)                                         | 4 (1)                                            | 0.408          |
| Lymphoma                                 | 1 (0)                                         | 7 (1)                                            | 0.137          |
| Solid tumor with metastases              | 9 (3)                                         | 21 (4)                                           | 0.364          |

**Abbreviations:** AIDS, acquired immune deficiency syndrome; n, number; RDW, red cell distribution width;

**Supplementary Table S2** – Cox-Regression model for RDW and factors associated with 28d-Mortality

| <i>Cox regression</i> | <b>Covariables</b>                            | HR (95% CI)           | <i>p</i> value |
|-----------------------|-----------------------------------------------|-----------------------|----------------|
| <i>Final Model</i>    | <b>RDW</b> (high vs. low)                     | 1.372 (1.045 – 1.802) | 0.023          |
|                       | <b>Gender</b> (male vs. female)               | 1.007 (0.782 – 1.297) | 0.955          |
|                       | <b>SAPS II</b> (points)                       | 1.051 (1.040 – 1.061) | < 0.001        |
|                       | <b>Myocardial Infarction</b> (yes vs. no)     | 1.164 (0.836 – 1.622) | 0.368          |
|                       | <b>Chronic Lung Disease</b> (yes vs. no)      | 0.752 (0.477 – 1.184) | 0.218          |
|                       | <b>Chronic kidney disease</b> (yes vs. no)    | 0.979 (0.744 – 1.289) | 0.881          |
|                       | <b>Diabetes Mellitus Type II</b> (yes vs. no) | 0.744 (0.504 – 1.097) | 0.136          |
|                       | <b>Mechanical Ventilation</b> (yes vs. no)    | 1.568 (1.169 – 2.103) | 0.003          |
|                       | <b>Vasopressors</b> (yes vs. no)              | 1.513 (1.113 – 2.058) | 0.008          |

Abbreviations: HR, hazard ratio; CI, confidence interval; RDW, red cell distribution width; SAPS II, simplified acute physiology score II;
